# Supplementary material for: Prognostic Significance of HPV DNA and p16INK4a in Anal Cancer: A Systematic Review and Meta-Analysis
Source: Oxford University Press journal article supplement (doi:10.1158/1055-9965.epi-19-1259), 2020-02-12
Supplement: 10559965epi191259-sup-230452_2_supp_5974303_q4r999.docx [file 10559965epi191259-sup-230452_2_supp_5974303_q4r999.docx]

**Figure S1.** Search strategy in PubMed, EMBASE and Cochrane Library.

**Search strategy – PubMed**

**Anal cancer + HPV/p16 + survival:**

| Anal [Text Word] | AND | Cancer* [Text Word] |
| --- | --- | --- |
| Anus [Text Word] | Malignan* [Text Word] |
| Anal canal [MeSH] | Neoplas* [Text Word] |
|  | Carcinoma* [Text Word] |
|  | Neoplasms [MeSH] |
|  |  |
| OR | | |
| Anus neoplasms [MeSH Terms] | | |

**AND**

| Survival [Text Word] |
| --- |
| Prognos* [Text Word] |
| Mortality [Text Word] |
| Survival [MeSH] |
| Prognosis [MeSH] |
| Mortality [MeSH] |
| Survival analysis [MeSH] |

**AND**

| Papilloma virus* [Text Word] | AND | Human* [Text Word] |
| --- | --- | --- |
| Papillomavirus* [Text Word] | Humans [MeSH] |
| Papillomaviridae [MeSH] |  |
| Papillomavirus infections [MeSH] |  |
| OR | | |
| HPV [Text Word] | | |
| OR | | |
| genes, p16 [MeSH] | | |
| cyclin dependant kinase inhibitor p16 [MeSH] | | |
| p16* [Text Word] | | |

Search result: 450 hits

Limit to English: 412 hits

**Search strategy – EMBASE**

**Anal cancer + HPV/p16 + survival:**

| Anal [Text Word] | AND | Cancer [Text Word] |
| --- | --- | --- |
| Anus [Text Word] | Malignan* [Text Word] |
| Anal canal [MeSH] | Neoplas* [Text Word] |
|  | Carcinoma [Text Word] |
|  | Neoplasm [MeSH] |
|  |  |
| OR | | |
| Anus tumor [MeSH Terms] | | |

**AND**

| Survival [Text Word] |
| --- |
| Prognos* [Text Word] |
| Mortality [Text Word] |
| Survival [MeSH] |
| Prognosis [MeSH] |
| Mortality [MeSH] |
| Survival analysis [MeSH] |

**AND**

| Papilloma virus [Text Word] | AND | Human* [Text Word] |
| --- | --- | --- |
| Papillomavirus [Text Word] | Human [MeSH] |
| Papillomaviridae [MeSH] |  |
| Papillomavirus infections [MeSH] |  |
| OR | | |
| HPV [Text Word] | | |
| OR | | |
| tumor suppressor gene [MeSH] | | |
| protein p16 [MeSH] | | |
| p16* [Text Word] | | |

Search result: 697 hits

English: 659 hits

**Search strategy – Cochrane Library**

| Anal [Text Word] | AND | Cancer* [Text Word] |
| --- | --- | --- |
| Anus [Text Word] | Malignan* [Text Word] |
| Anal canal [MeSH] | Neoplas* [Text Word] |
|  | Carcinoma* [Text Word] |
|  | Neoplasms [MeSH] |
| OR | | |
| Anus neoplasms [MeSH] | | |

**AND**

| Survival [Text Word] |
| --- |
| Prognos* [Text Word] |
| Mortality [Text Word] |
| Survival [MeSH] |
| Prognosis [MeSH] |
| Mortality [MeSH] |
| Survival analysis [MeSH] |

**AND**

| Papilloma virus* [Text Word] | AND | Human* [Text Word] |
| --- | --- | --- |
| Papillomavirus* [Text Word] | Humans [MeSH] |
| Papillomaviridae [MeSH] |  |
| Papillomavirus infections [MeSH] |  |
| OR | | |
| HPV [Text Word] | | |
| OR | | |
| genes, p16 [MeSH] | | |
| cyclin dependant kinase inhibitor p16 [MeSH] | | |
| p16* [Text Word] | | |

Search result: 26 hits
